# Supplementary material
Source: Springer Nature journal article supplement (https://www.springermedizin.de/resource/supplementary/12884_2008_177_MOESM13_ESM.pdf/9459788)
Supplement: MOESM13 [file 9459788]

# Index Test

## Study Details

## Likelihood ratio of positive test (95% CI)

## Likelihood ratio of negative test (95% CI)

| Threshold                                             | No of studies | No of women |
|-------------------------------------------------------|---------------|-------------|
| <i>Papp</i> a < median <sup>a</sup>                   | 1             | 52,97       |
| <i>Papp</i> a < 10 <sup>th</sup> centile <sup>a</sup> | 3             | 39,570      |
| <i>Papp</i> a < 5 <sup>th</sup> centile <sup>a</sup>  | 5             | 52,472      |
| <i>Papp</i> a < 1 <sup>st</sup> centile <sup>a</sup>  | 1             | 33,395      |
| <i>Papp</i> a < 1.0 MoM <sup>b</sup>                  | 1             | 1,622       |
| <i>Papp</i> a < 0.75 MoM <sup>b</sup>                 | 1             | 1,622       |
| <i>Papp</i> a < 0.5 MoM <sup>b</sup>                  | 1             | 1,622       |
| <i>Papp</i> a < 0.25 MoM <sup>b</sup>                 | 1             | 1,622       |

| Threshold                                             | No of studies | No of women |
|-------------------------------------------------------|---------------|-------------|
| <i>Papp</i> a > 99 <sup>th</sup> centile <sup>a</sup> | 1             | 6,276       |
| <i>Papp</i> a > 95 <sup>th</sup> centile <sup>a</sup> | 1             | 6,276       |
| <i>Papp</i> a > 90 <sup>th</sup> centile              | 1             | 172         |
| <i>Papp</i> a < median <sup>b</sup>                   | 1             | 5,297       |
| <i>Papp</i> a < 10 <sup>th</sup> centile              | 2             | 380         |
| <i>Papp</i> a < 5 <sup>th</sup> centile <sup>a</sup>  | 4             | 46,446      |
| <i>Papp</i> a < 1 <sup>st</sup> centile <sup>a</sup>  | 2             | 40,271      |
| <i>Papp</i> a < 0.69 MoM <sup>b</sup>                 | 1             | 476         |
| <i>Papp</i> a < 0.5 MoM <sup>b</sup>                  | 2             | 1,831       |
| <i>Papp</i> a < 0.4 MoM <sup>b</sup>                  | 1             | 476         |
| <i>Papp</i> a < 0.3 MoM <sup>b</sup>                  | 1             | 827         |

| Threshold                                             | No of studies | No of women |
|-------------------------------------------------------|---------------|-------------|
| <i>Papp</i> a < median <sup>a</sup>                   | 1             | 5,297       |
| <i>Papp</i> a < 10 <sup>th</sup> centile <sup>a</sup> | 3             | 40,170      |
| <i>Papp</i> a < 5 <sup>th</sup> centile <sup>a</sup>  | 4             | 49,009      |
| <i>Papp</i> a < 1 <sup>st</sup> centile <sup>a</sup>  | 1             | 33,995      |

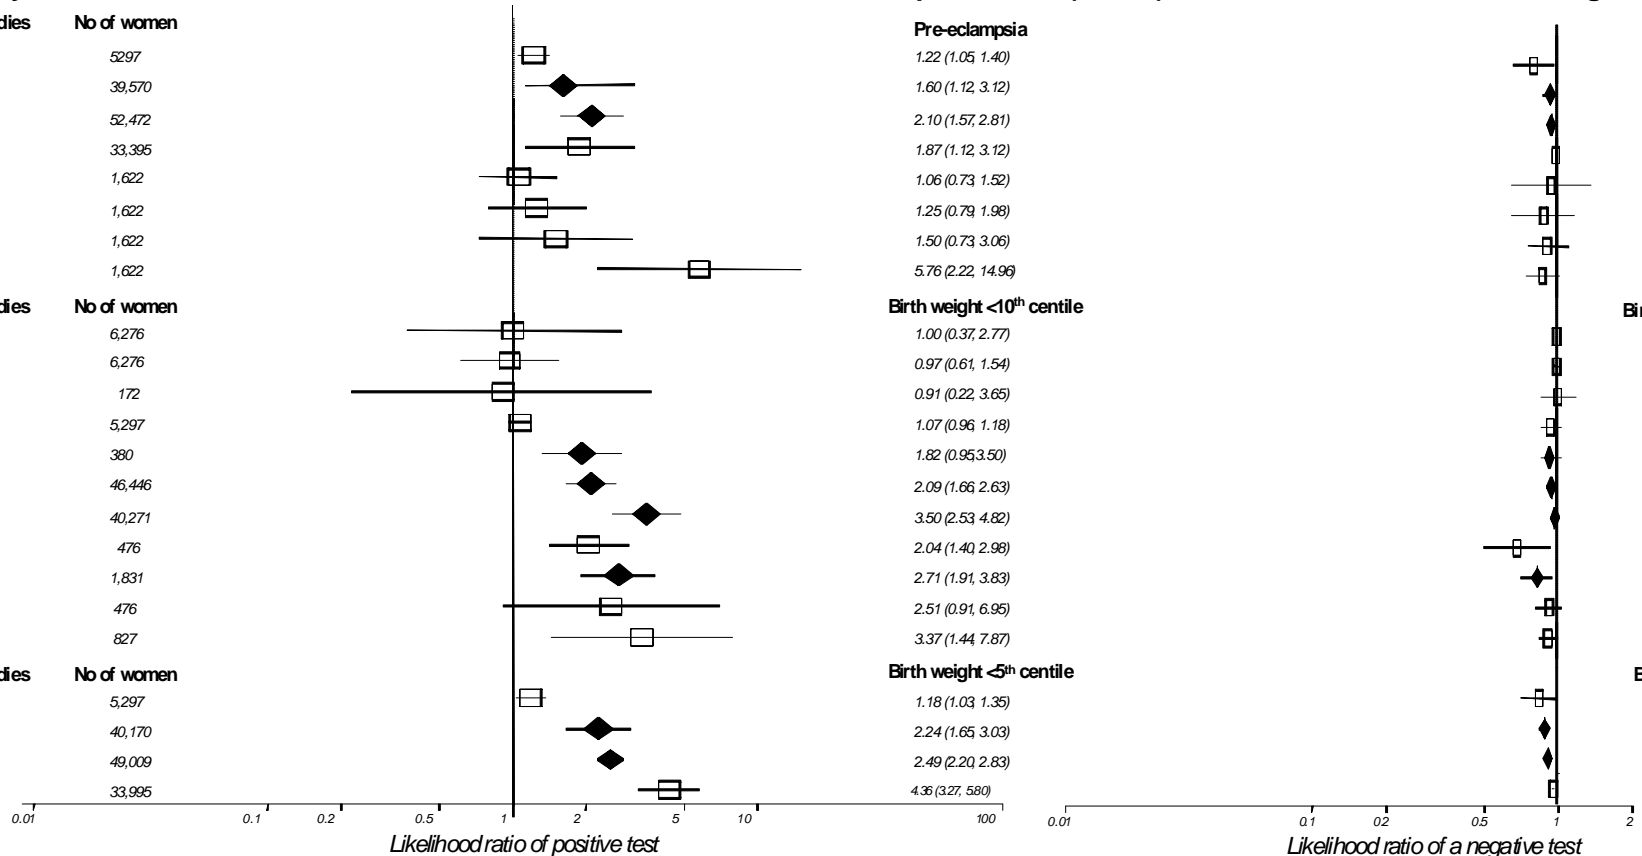

| Pre-eclampsia                          | Pre-eclampsia                          |
|----------------------------------------|----------------------------------------|
| 1.22 (1.05, 1.40)                      | 0.87 (0.65, 0.98)                      |
| 1.60 (1.12, 3.12)                      | 0.94 (0.88, 1.00)                      |
| 2.10 (1.57, 2.81)                      | 0.95 (0.93, 0.98)                      |
| 1.87 (1.12, 3.12)                      | 0.99 (0.99, 1.00)                      |
| 1.06 (0.73, 1.52)                      | 0.95 (0.64, 1.40)                      |
| 1.25 (0.79, 1.98)                      | 0.88 (0.64, 1.20)                      |
| 1.50 (0.73, 3.06)                      | 0.91 (0.75, 1.12)                      |
| 5.76 (2.22, 14.96)                     | 0.87 (0.75, 1.02)                      |
| Birth weight <10 <sup>th</sup> centile | Birth weight <10 <sup>th</sup> centile |
| 1.00 (0.37, 2.77)                      | 1.00 (0.99, 1.01)                      |
| 0.97 (0.61, 1.54)                      | 1.00 (0.98, 1.02)                      |
| 0.91 (0.22, 3.65)                      | 1.01 (0.85, 1.21)                      |
| 1.07 (0.96, 1.18)                      | 0.94 (0.85, 1.04)                      |
| 1.82 (0.95, 3.50)                      | 0.91 (0.79, 1.05)                      |
| 2.09 (1.66, 2.63)                      | 0.95 (0.93, 0.97)                      |
| 3.50 (2.53, 4.82)                      | 0.98 (0.97, 0.99)                      |
| 2.04 (1.40, 2.98)                      | 0.68 (0.49, 0.94)                      |
| 2.71 (1.91, 3.83)                      | 0.83 (0.71, 0.96)                      |
| 2.51 (0.91, 6.95)                      | 0.93 (0.82, 1.05)                      |
| 3.37 (1.44, 7.87)                      | 0.92 (0.84, 1.01)                      |
| Birth weight <5 <sup>th</sup> centile  | Birth weight <5 <sup>th</sup> centile  |
| 1.18 (1.03, 1.35)                      | 0.84 (0.70, 0.99)                      |
| 2.24 (1.65, 3.03)                      | 0.89 (0.84, 0.93)                      |
| 2.49 (2.20, 2.83)                      | 0.92 (0.91, 0.94)                      |
| 4.36 (3.27, 5.80)                      | 0.97 (0.96, 0.98)                      |

Likelihood ratio of positive test

Likelihood ratio of a negative test
